# Supplementary material
Source: publisher site journal article supplement (https://www.spandidos-publications.com/7225/downloadSupplementary)
Supplement: Supplementary file 1 [file downloadSupplementary]

**Table SI.** Available clinical studies on the use of [<sup>68</sup>Ga]-DOTA-conjugated somatostatin receptor-targeting peptide PET in patients with glioma.

| First author, year            | Investigated radiotracer                                                                                                                                                                                                              | Subject | No. of subjects | Tumor diagnosis                                                                                                                                                                                                        | Tracer dosage                                                                                | Tracer uptake time, min | PET performance                                                                                                                                                                                                                                                                                                                                                                                           | (Ref.) |
|-------------------------------|---------------------------------------------------------------------------------------------------------------------------------------------------------------------------------------------------------------------------------------|---------|-----------------|------------------------------------------------------------------------------------------------------------------------------------------------------------------------------------------------------------------------|----------------------------------------------------------------------------------------------|-------------------------|-----------------------------------------------------------------------------------------------------------------------------------------------------------------------------------------------------------------------------------------------------------------------------------------------------------------------------------------------------------------------------------------------------------|--------|
| Collamati <i>et al</i> , 2015 | <sup>68</sup> Ga-DOTATOC                                                                                                                                                                                                              | Human   | 12              | Recurrent glioma (n=12), including high-grade glioma (n=10), oligodendroglioma (n=1) and pontine glioma (n=1)<br><br>(Note: Grading N/A)                                                                               | 3 MBq/kg                                                                                     | 50                      | <i>"The tumor to-nontumor ratio was always at least 4 and was twice as high in a third of the cases. The only case in which uptake was marginal was the only oligodendroglioma in the sample. [...] In high-grade gliomas, the uptake was lower than in meningiomas, but the tumor-to-nontumor ratio was higher than 4, which implies that the tracer can still be effective for radioguided surgery"</i> | (13)   |
| Kiviniemi <i>et al</i> , 2015 | <sup>68</sup> Ga-DOTATOC<br><br><sup>68</sup> Ga-DOTANOC<br><br>(Note: <sup>68</sup> Ga-DOTANOC replaced <sup>68</sup> Ga-DOTATOC as the tracer in practice after first 3 patients due to poor availability of the DOTATOC precursor) | Human   | 27              | Primary glioma (N=17), including glioblastoma IV (n=5), glioblastoma with oligodendroglial component IV (n=2), gliosarcoma IV (n=1), astrocytoma III (n=7), oligodendroglioma III (n=1) and oligoastrocytoma III (n=1) | 123 MBq (median) ( <sup>68</sup> Ga-DOTANOC)<br>130 MBq (median) ( <sup>68</sup> Ga-DOTATOC) | 60                      | <i>"All 19 high-grade gliomas with uptake demonstrated disrupted blood-brain barrier [...] whereas no uptake was detected with intact blood-brain barrier"</i>                                                                                                                                                                                                                                            | (8)    |

|                        |                           |       |   |                                                                                                                                             |         |     |                                                                                                                                                                                                                                                         |      |
|------------------------|---------------------------|-------|---|---------------------------------------------------------------------------------------------------------------------------------------------|---------|-----|---------------------------------------------------------------------------------------------------------------------------------------------------------------------------------------------------------------------------------------------------------|------|
|                        |                           |       |   | Recurrent glioma (N=10), including glioblastoma IV (n=6), astrocytoma III (n=1), oligodendroglioma III (n=1) and oligoastrocytoma III (n=2) |         |     |                                                                                                                                                                                                                                                         |      |
| Li <i>et al</i> , 2023 | <sup>68</sup> Ga-DOTATATE | Human | 1 | Recurrent glioma (N=1), including oligodendroglioma (n=1)<br><br>(Note: Grading N/A)                                                        | N/A     | N/A | <i>"[...] <sup>68</sup>Ga-DOTATATE PET imaging depends on the blood-brain barrier permeability, limiting the utility for visualizing tumor regions. [...] the pseudoprogession of glioma may cause <sup>68</sup>Ga-DOTATATE uptake [...]"</i>           | (16) |
| Savelli and Muni, 2015 | <sup>68</sup> Ga-DOTANOC  | Human | 1 | Recurrent glioma (N=1), including oligodendroglioma III (n=1)                                                                               | 110 MBq | 60  | <i>"<sup>68</sup>Ga DOTANOC PET/CT disclosed the presence of a grossly round-shaped uptake corresponding to the surgical wall. [...] <sup>68</sup>Ga DOTANOC PET/CT has high sensitivity and specificity for SSTR's detection in oligodendroglioma"</i> | (17) |

|                             |                               |       |   |                                                                |                      |       |                                                                                                                                                                                                                                                                                                                                                                                                                                                                                                         |      |
|-----------------------------|-------------------------------|-------|---|----------------------------------------------------------------|----------------------|-------|---------------------------------------------------------------------------------------------------------------------------------------------------------------------------------------------------------------------------------------------------------------------------------------------------------------------------------------------------------------------------------------------------------------------------------------------------------------------------------------------------------|------|
| Lapa <i>et al</i> ,<br>2015 | <sup>68</sup> Ga-<br>DOTATATE | Human | 3 | Primary glioma<br>(N=3), including<br>glioblastoma IV<br>(n=3) | 121±12 MBq<br>(mean) | 40-60 | <i>"All 3 patients who<br/>underwent SSTR-PET/CT<br/>showed areas of markedly<br/>increased <sup>68</sup>Ga-<br/>DOTATATE uptake.<br/>Median SUV<sub>mean</sub> was 3.9<br/>[...]. [...] <sup>68</sup>Ga-DOTATATE<br/>uptake was highest in areas<br/>with distinct contrast<br/>enhancement on MR<br/>imaging. [...] somatostatin<br/>receptor-targeted tracer<br/>uptake in glioblastoma<br/>seems to be highly<br/>unspecific and caused by<br/>the disruption of the blood-<br/>brain barrier."</i> | (15) |
|-----------------------------|-------------------------------|-------|---|----------------------------------------------------------------|----------------------|-------|---------------------------------------------------------------------------------------------------------------------------------------------------------------------------------------------------------------------------------------------------------------------------------------------------------------------------------------------------------------------------------------------------------------------------------------------------------------------------------------------------------|------|

PET, positron emission tomography.

**Table SII.** Available preclinical studies on the use of [68Ga]-DOTA-conjugated somatostatin receptor-targeting peptide PET in glioma models.

| First author, year            | Investigated radiotracer | Receiving subject | Transplanted biomaterial | Mode of transplantation                             | Tumor diagnosis                                                | No. of animals | PET performance                                                                                                                                                                                                                                                                                                                                                                   | (Ref.) |
|-------------------------------|--------------------------|-------------------|--------------------------|-----------------------------------------------------|----------------------------------------------------------------|----------------|-----------------------------------------------------------------------------------------------------------------------------------------------------------------------------------------------------------------------------------------------------------------------------------------------------------------------------------------------------------------------------------|--------|
| Kiviniemi <i>et al</i> , 2014 | <sup>68</sup> Ga-DOTATOC | Rats and mice     | BT4C cell line           | Orthotopic (brain) and heterotopic (subcutaneously) | Chemically-induced malignant glioma<br><br>(Note: Grading N/A) | 9 and 16       | <i>“Weak signal in PET imaging [...] suggests only limited benefit of [<sup>68</sup>Ga]DOTATOC [...] in this tumor model for in vivo imaging of SSTR2 status. [...] Visualization of BT4C tumors [...] was limited. Rat orthotopic BT4C gliomas were all modestly visualized [...]. However, of sixteen subcutaneous BT4C tumors in nude mice only six were visualized [...]”</i> | (14)   |

PET, positron emission tomography.
